# Supplementary material for: Systematic Review of Acupuncture for Chronic Prostatitis/Chronic Pelvic Pain Syndrome
Source: PubMed Central journal article supplement (PMC4839929; doi:10.1097/md.0000000000003095), 2016-03-18
Supplement: medi-95-e3095-s001.pdf [file medi-95-e3095-s001.pdf]

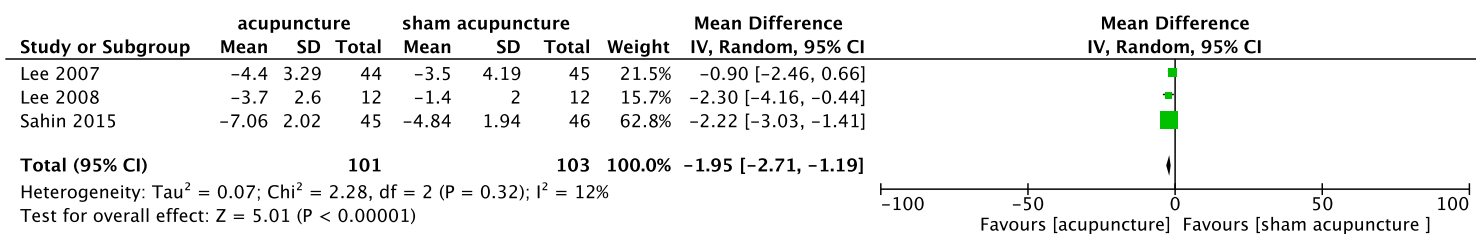

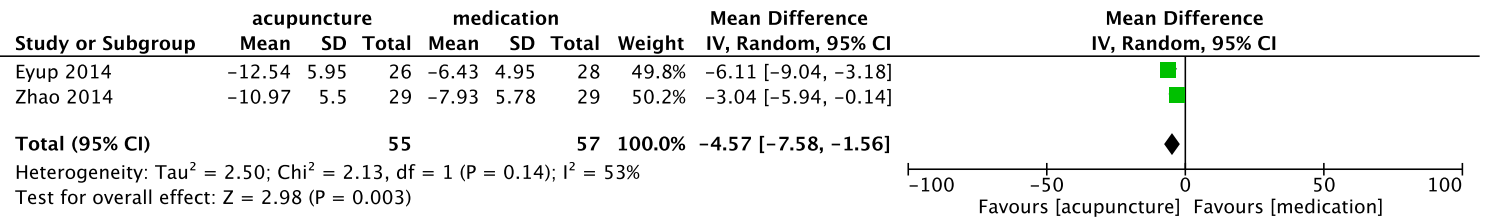

Supplemental Table 1 Search strategy used in PubMed database

| No. | Search Items                                |
|-----|---------------------------------------------|
| 1   | randomized controlled trial.pt              |
| 2   | controlled clinical trial.pt                |
| 3.  | randomized.ti,ab                            |
| 4.  | randomly.ti,ab                              |
| 5.  | groups.ti,ab                                |
| 6.  | trial.ti,ab                                 |
| 7.  | or 1-6                                      |
| 8.  | acupuncture.ti,ab                           |
| 9.  | electro-acupuncture.ti,ab                   |
| 10. | elongated needle.ti,ab                      |
| 11. | three edged needle.ti,ab                    |
| 12. | (fire needle or warming needle).ti,ab       |
| 13. | auricular acupuncture.ti,ab                 |
| 14. | abdominal acupuncture.ti,ab                 |
| 15. | warm acupuncture.ti,ab                      |
| 16. | pyonex.ti,ab                                |
| 17. | or 8-16                                     |
| 18. | chronic prostatitis.ti,ab                   |
| 19. | chronic pelvic pain syndrome.ti,ab          |
| 20. | non-bacterial prostatitis.ti,ab             |
| 21. | prostatitides.ti,ab                         |
| 22. | inflammatory prostatitides.ti,ab            |
| 23. | inflammatory prostatitis.ti,ab              |
| 24. | asymptomatic inflammatory prostatitis.ti,ab |
| 25. | or 18-24                                    |
| 26. | 7 and 17 and 25                             |

This search strategy will be modified as required for other electronic databases.

Supplemental Table 2 Characteristics of included randomized controlled trials

| Study                          | Location (published language) | Sample size   | Diagnosis       | Interventions of treatment group                                                                                                                                                                                                                                  | Intervention of control group                                                                                                                                                                          | Test duration (week) | Outcomes                                      | Adverse event                                                                                                                                                                   |
|--------------------------------|-------------------------------|---------------|-----------------|-------------------------------------------------------------------------------------------------------------------------------------------------------------------------------------------------------------------------------------------------------------------|--------------------------------------------------------------------------------------------------------------------------------------------------------------------------------------------------------|----------------------|-----------------------------------------------|---------------------------------------------------------------------------------------------------------------------------------------------------------------------------------|
| <b>Sham controlled</b>         |                               |               |                 |                                                                                                                                                                                                                                                                   |                                                                                                                                                                                                        |                      |                                               |                                                                                                                                                                                 |
| Lee et al 2008 <sup>24</sup>   | Malasia (English)             | 89 (44/45)    | CP/CPSS         | Needle parameter: 0.3mm stainless needles<br>Depth: 40-60mm, depending on location of acupoints<br>Points: CV1, CV4, SP6, SP9<br>Duration: 30mins, twice a week<br>Manipulation: rotation                                                                         | Needle parameter: 0.3mm stainless needles<br>Depth: 25mm for all points<br>Points: 15mm to the left of actual CV1, CV4, SP6, SP9<br>Duration: 30mins, twice a week<br>Manipulation: manual acupuncture | 10                   | NIH-CPSI<br>IPSS<br>IIEF<br>Global assessment | 8 in the acupuncture group (6 hematoma and 2 with pain at needling sites)<br>5 in the sham group (1 hematoma, 3 with pain at needling sites and 1 with acute urinary retention) |
| Lee et al 2009 <sup>25</sup>   | Korea (English)               | 36 (12/12/12) | CP/CPSS         | Needle parameter: 0.25mm stainless needles<br>Depth: 30mm<br>Points: BL32, BL33, GB30<br>Duration: 20mins, twice a week<br>Manipulation: The needles were stimulated electrically with a frequency of 4Hz and an intensity of 5-10mA with continuous stimulation. | Needle parameter: 0.25mm stainless needles<br>Depth: 30mm<br>Points: 15 mm to the lateral of BL32, BL33, GB30<br>Duration: 20mins, twice a week<br>Manipulation: None                                  | 6                    | NIH-CPSI<br>IPSS<br>Global assessment         | 1 in the sham group (lower back pain near the needling site that resolved quickly)                                                                                              |
| Sahin et al 2015 <sup>27</sup> | Turkey (English)              | 91 (45/46)    | CP/CPSS<br>IIIB | Needle parameter: 0.3mm stainless needles<br>Depth: 25-30mm<br>Points: BL33, BL34, BL54, CV1, CV4, SP6, SP9<br>Duration: 20mins, once a week<br>Manipulation: rotation                                                                                            | Needle parameter: 0.3mm stainless needles<br>Depth: 25-30mm<br>Points: 10 mm left of BL33, BL34, BL54, CV1, CV4, SP6, SP9<br>Duration: 20mins, once a week<br>Manipulation: rotation                   | 6                    | NIH-CPSI                                      | No adverse events were reported in both groups                                                                                                                                  |
| Zhao et al 2014 <sup>28</sup>  | China (Chinese)               | 86 (29/29/28) | CP/CPSS<br>IIIB | Needle parameter: NR<br>Depth: NR<br>Points: LU7, SI3, SP4<br>Duration: 20mins, twice a week<br>Manipulation: rotation                                                                                                                                            | Needle parameter: NR<br>Depth: NR<br>Points: 15 mm to the lateral of LU7, SI3, SP4<br>Duration: 20mins, twice a week<br>Manipulation: rotation                                                         | 4                    | NIH-CPSI                                      | NR                                                                                                                                                                              |
| <b>Medicine controlled</b>     |                               |               |                 |                                                                                                                                                                                                                                                                   |                                                                                                                                                                                                        |                      |                                               |                                                                                                                                                                                 |
| Kucuk et al 2015 <sup>22</sup> | Turkey (English)              | 54 (26/28)    | CP/CPSS<br>IIIB | Needle parameter: 0.25mm stainless needles<br>Depth: 25-30mm<br>Points: UP28, GB41, LIV3, SP6, SP8, LI4<br>Duration: 20mins, twice a week<br>Manipulation: electro-acupuncture                                                                                    | levofloxacin 500 mg daily and ibuprofen 200 mg twice a day for 6 weeks                                                                                                                                 | 7                    | NIH-CPSI                                      | No adverse events were reported in both groups                                                                                                                                  |
| Zhao et al 2014 <sup>28</sup>  | China (Chinese)               | 86 (29/29/28) | CP/CPSS<br>IIIB | Needle parameter: NR<br>Depth: NR<br>Points: LU7, SI3, SP4<br>Duration: 20mins, twice a week<br>Manipulation: rotation                                                                                                                                            | Tamsulosin 0.2 mg daily for 4 weeks                                                                                                                                                                    | 4                    | NIH-CPSI                                      | NR                                                                                                                                                                              |
| Liu et al 2012 <sup>25</sup>   | China (Chinese)               | 55 (32/33)    | CP/CPSS         | Needle parameter: 0.3mm stainless needles<br>Depth: 100mm for CV54, 30mm for others<br>Points: CV54, CV4, ST28, SP6, LIV3, EX-HN1<br>Duration: 20mins, three times a week<br>Manipulation: rotation                                                               | Prostat 70 mg twice a day and fluoxetine 20 mg daily for 4 weeks                                                                                                                                       | 4                    | NIH-CPSI<br>Global assessment                 | NR                                                                                                                                                                              |
| Qi et al 2012 <sup>26</sup>    | China (Chinese)               | 60 (30/30)    | CP/CPSS         | Needle parameter: NR<br>Depth: 25-50mm<br>Points: CV1, CV3, CV4, SP9, SP10<br>Duration: 30mins, twice a week<br>Manipulation: rotation<br>Terazosin 2mg daily for 4 weeks                                                                                         | Terazosin 2mg daily for 4 weeks                                                                                                                                                                        | 4                    | NIH-CPSI                                      | NR                                                                                                                                                                              |

NIH-CPSI: National Institute of Health Chronic Prostatitis Symptom Index; IPSS: International Prostate Symptom Score; IIEF: International Index of Erectile Function; NR: no report

Supplemental Table 3 NIH-CPSI outcomes of randomized controlled trials

| Study                          | Group   | Participants | NIH-CPSI                             |                     |                   |                   |                   |             |                |            |
|--------------------------------|---------|--------------|--------------------------------------|---------------------|-------------------|-------------------|-------------------|-------------|----------------|------------|
|                                |         |              | Baseline / After treatment (mean±SD) |                     |                   |                   | Changes (mean±SD) |             |                |            |
|                                |         |              | Total score                          | Pain domain         | Voiding domain    | Qof domain        | Total score       | Pain domain | Voiding domain | Qof domain |
| Lee et al 2008 <sup>24</sup>   | Acu     | 44           | 24.8±6.2 / 14.5±8.7                  | 11.4±3.4 / 7±4.5    | 4.1±3.7 / 0±2.9   | 9.1±1.6 / 3.5±5.5 | 10.3±7.7          | 4.4±3.3     | 4.1±3.3        | 5.8±4.9    |
|                                | SAC     | 45           | 25.2±5.8 / 19±10.3                   | 11.5±2.9 / 8±4.8    | 4.3±3.7 / 2±3.2   | 9.4±1.8 / 8±3.8   | 5.9±7.7           | 3.5±4.2     | 2.3±3.5        | 1.5±3.3    |
| Lee et al 2009 <sup>25</sup>   | Acu     | 12           | 26.9±5.2 / NR                        | 12.2±2.5 / NR       | 5.3±3 / NR        | 9.4±1.8 / NR      | 9.5±3.7           | 5.2±1.9     | 1.8±1.5        | 2.6±2.4    |
|                                | SAC     | 12           | 25.5±3.6 / NR                        | 11.8±2.7 / NR       | 3.8±2.8 / NR      | 9.8±1.6 / NR      | 3.5±3.6           | 1.6±1.8     | 0.7±1.4        | 1.3±1.8    |
| Sahin et al 2015 <sup>27</sup> | Acu     | 45           | 27±3.5 / 10.8±1.9                    | 13.2±2.3 / 6.1±1.5  | 4.6±1.2 / 2.2±0.9 | 9.1±1.5 / 2.5±0.8 | 15.9±3            | 7.1±2       | 2.4±1.1        | 6.6±1.3    |
|                                | SAC     | 46           | 26.5±3.7 / 16.2±6.6                  | 13±2.2 / 8.2±3.2    | 4.5±1.4 / 3.5±1.2 | 8.9±1.4 / 4.6±2.8 | 9.4±5.8           | 4.8±1.9     | 1±1.3          | 4.3±2.4    |
| Zhao et al 2014 <sup>28</sup>  | Acu     | 29           | 24.5±6.3 / 13.5±3.6                  | 13.7±3.2 / 6.5±2.4  | 5.4±1.5 / 3.3±1   | 5.3±1.9 / 4.2±1.4 | 10.9±5.5          | 7.2±2.9     | 2.1±1.3        | 1.1±1.7    |
|                                | SAC     | 29           | 25.6±6.4 / 24±5.5                    | 14.1±3.6 / 13.3±3.3 | 6±1.5 / 5.4±1.4   | 5.4±2 / 5.3±1.7   | 1.5±3.5           | 0.8±3.5     | 0.6±1.3        | 0.2±1.9    |
|                                | Med     | 28           | 26.6±6.4 / 18.7±4.8                  | 14.4±4 / 10.8±2.9   | 6.2±1.1 / 2.7±1.1 | 6±2.3 / 4.5±1.5   | 7.9±5.8           | 3.7±3.5     | 3.5±1.1        | 0.5±2.1    |
| Kucuk et al 2015 <sup>22</sup> | Acu     | 26           | NR                                   | NR                  | NR                | NR                | 12.5±6            | 6.7±3.7     | 1.8±2.5        | 5.5±2.4    |
|                                | Mem     | 28           | NR                                   | NR                  | NR                | NR                | 6.4±5             | 3.9±3       | 0.8±1.4        | 4.3±2.7    |
| Liu et al 2012 <sup>25</sup>   | Acu     | 32           | 27.9±4.7 / 9.9±2.7                   | NR                  | NR                | NR                | 18±4.1            | NR          | NR             | NR         |
|                                | Med     | 33           | 25.8±5.9 / 19.4±6.2                  | NR                  | NR                | NR                | 6.4±6.1           | NR          | NR             | NR         |
| Qi et al 2012 <sup>26</sup>    | Acu+Med | 30           | 24.1±5.5 / 13.2±5.8                  | 13.1±3.2 / 6.4±2.9  | 2.3±2.2 / 1.3±1.6 | 9±1.6 / 5.5±2.3   | 10.9±5.6          | 6.7±3       | 1±2            | 3.5±2      |
|                                | Med     | 30           | 23.1±4.2 / 16.6±3.5                  | 3±2.7 / 7.5±2.1     | 3±2.7 / 2.1±2.2   | 8.5±1.6 / 6.9±1.5 | 6.5±3.9           | 4.1±3       | 0.9±2.5        | 1.6±1.5    |

NIH-CPSI: National Institute of Health Chronic Prostatitis Symptom Index; Acu: acupuncture; SAC: sham acupuncture; Med: medication; NR: no report

**Supplemental Table 4 ROB for included randomized controlled trials**

| Study                          | Sequence Generation | Allocation Concealment | Blinding | Incomplete Outcome Data | Selective Outcome Reporting | Other Sources of Bias |
|--------------------------------|---------------------|------------------------|----------|-------------------------|-----------------------------|-----------------------|
| Lee et al 2008 <sup>24</sup>   | +                   | 0                      | +        | +                       | +                           | +                     |
| Lee et al 2009 <sup>23</sup>   | +                   | 0                      | +        | +                       | +                           | -                     |
| Sahin et al 2015 <sup>27</sup> | +                   | 0                      | +        | +                       | +                           | +                     |
| Zhao et al 2014 <sup>28</sup>  | +                   | 0                      | -        | 0                       | 0                           | 0                     |
| Kucuk et al 2015 <sup>22</sup> | +                   | 0                      | -        | -                       | +                           | +                     |
| Liu et al 2012 <sup>25</sup>   | +                   | 0                      | 0        | -                       | -                           | 0                     |
| Qi et al 2012 <sup>26</sup>    | +                   | 0                      | -        | -                       | -                           | 0                     |

ROB: risk of bias; + indicates low risk of bias; 0, unclear; -, high risk of bias.
